# Supplementary material for: Contact-force radiofrequency ablation of non-paroxysmal atrial fibrillation: improved outcomes with increased experience
Source: Springer Nature journal article supplement (doi:10.1007/s10840-019-00618-8), 2019-11-09
Supplement: MOESM1 [file 17370244]

**Supplementary Table 1. Durability of Lesion Sets for CFS versus non-CFS**

|  | | | |
| --- | --- | --- | --- |
|  | **CFS (N=33)** | **Non-CFS (N=41)** | **p-value** |
| **Complete PV Isolation** | 59% | 39% | 0.102 |
| **RSPV Isolation** | 72% | 71% | 1 |
| **RIPV Isolation** | 75% | 71% | 0.794 |
| **LSPV Isolation** | 75% | 68% | 0.608 |
| **LIPV Isolation** | 81% | 76% | 0.776 |
| **CTI Block** | 81% | 94% | 0.229 |
| **Mitral Block** | 17% | 18% | 1 |
| **Roof Block** | 29% | 11% | 0.16 |
